# Supplementary material for: Controlled biosilification using self-assembled short peptides A6K and V6K
Source: Royal Society of Chemistry journal article supplement (doi:10.1039/c2ra22099g), 2012-12-20
Supplement: c2ra22099g.pdf [file c2ra22099g.pdf]

## **Supporting Information**

# **Controlled biosilification using self-assembled short peptides A<sub>6</sub>K and V<sub>6</sub>K**

**Qinrong Wang, Jun Yu, Xin Zhang,\* Daojun Liu, Jinhong Zheng, Ying Pan and Yuejuan Lin**

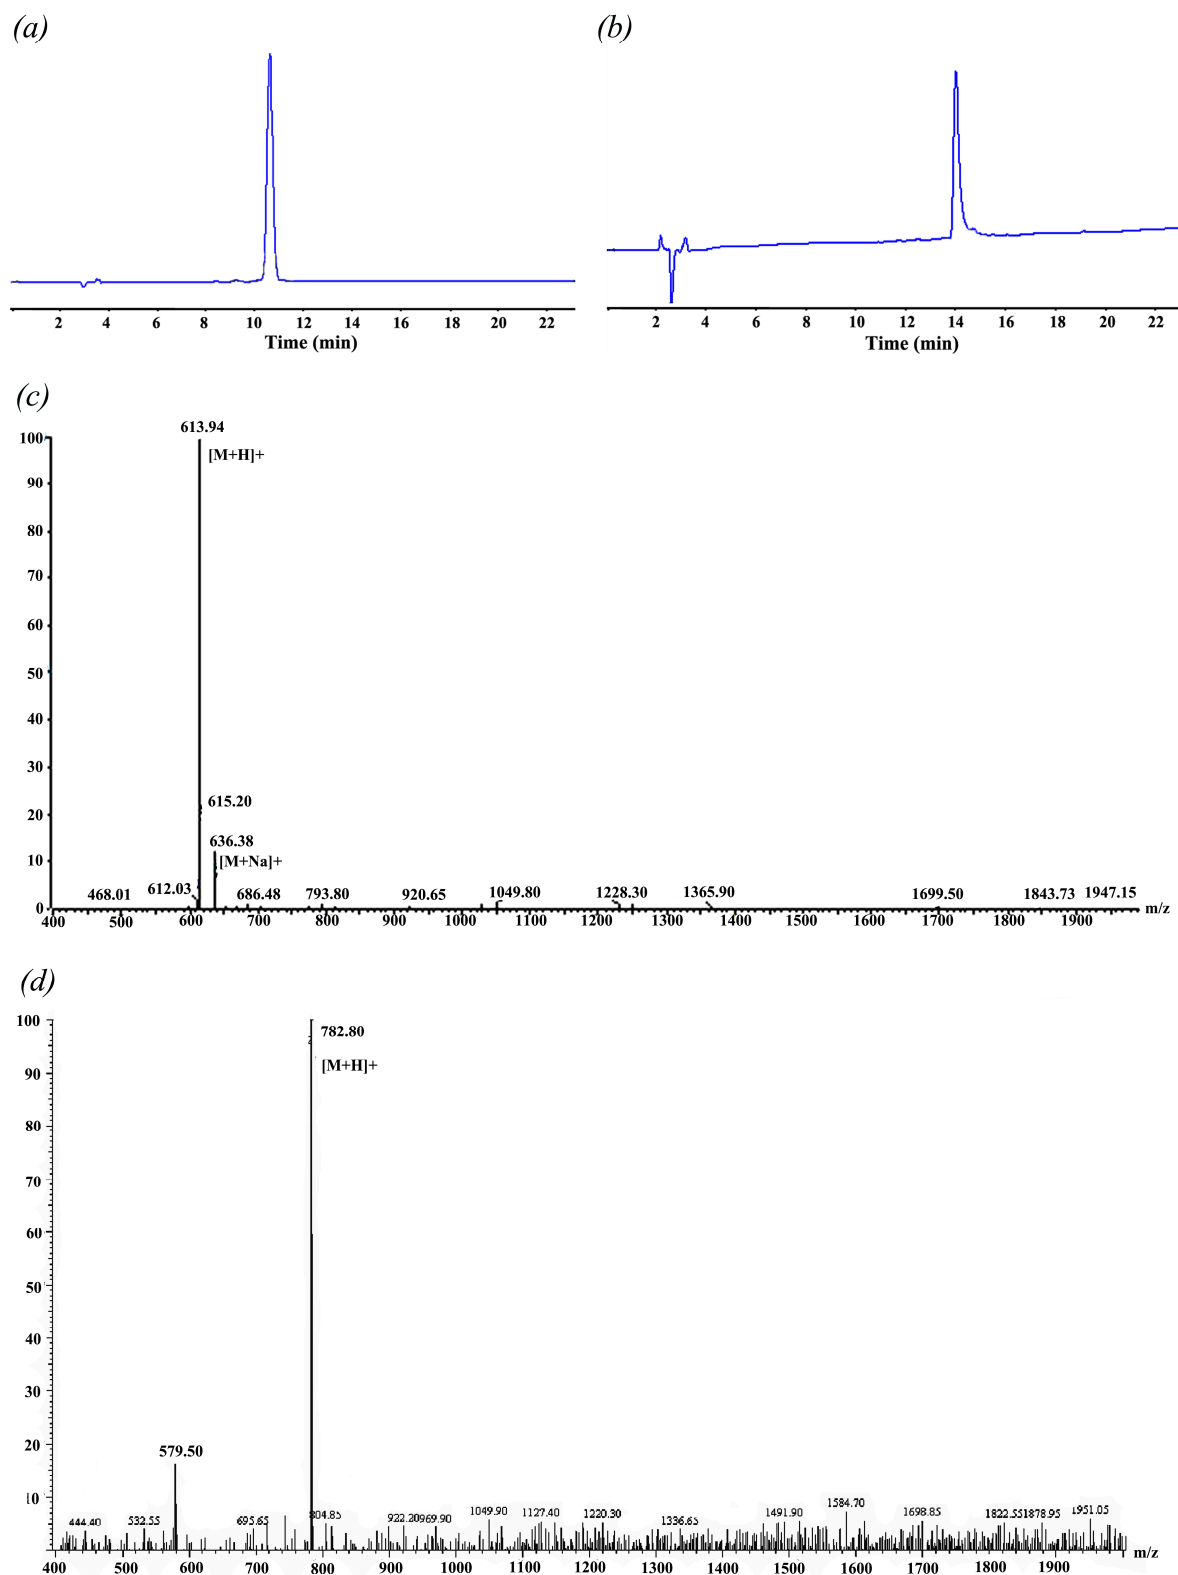

**Fig. S1** HPLC spectra of (a) A<sub>6</sub>K and (b) V<sub>6</sub>K. ESI-MS spectra of (c) A<sub>6</sub>K and (d) V<sub>6</sub>K. The conditions for HPLC analysis of the two peptides are as follows: eluent A, 0.1% trifluoroacetic acid in acetonitrile, eluent B, 0.1% trifluoroacetic acid in water, 0→2 min, 95% (A%), 3→22 min, 95→40% (A%); UV detector, 214 nm; flow rate, 1.0 mL/min; column, VYDAC-C18, 4.6 mm × 250 mm.

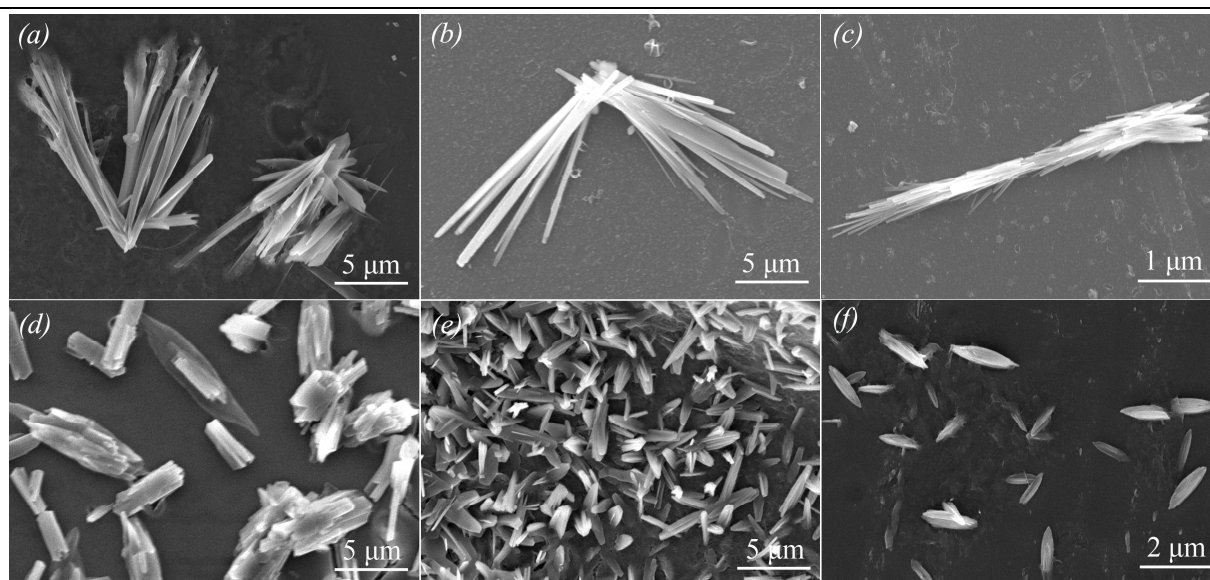

**Fig. S2** SEM images of biosilica produced by  $A_6K$  using different TEOS concentration of (a) 100 mM, (b) 20 mM, and (c) 5 mM. SEM images of biosilica produced by  $V_6K$  using different TEOS concentration of (a) 100 mM, (b) 20 mM, and (c) 5 mM. The additive anion is phosphate.

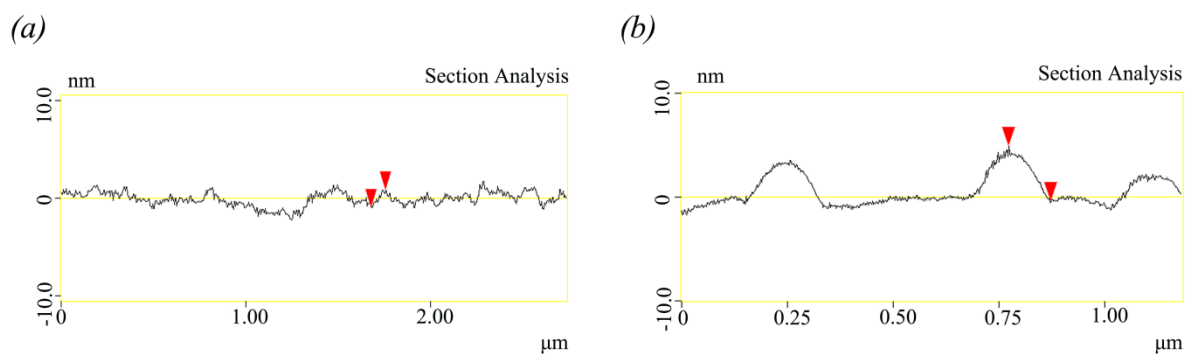

**Fig. S3** Typical height sections of (a) A<sub>6</sub>K nanofibers and (b) V<sub>6</sub>K nanostacks, respectively.

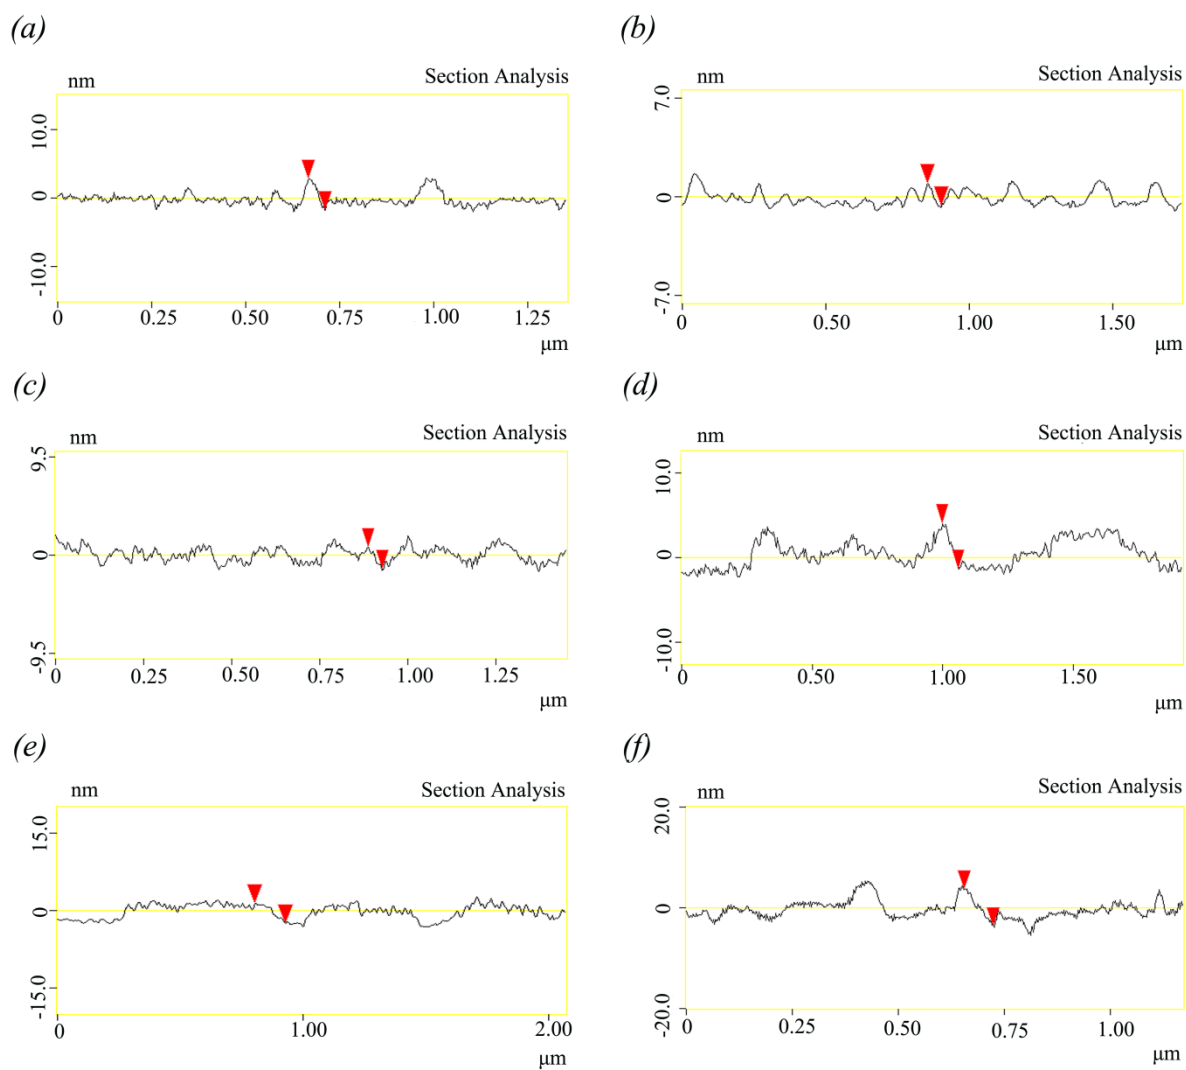

**Fig. S4** Typical height sections of  $A_6K$  in the presence of (a) sodium carbonate, (b) sodium sulfate, and (c) sodium phosphate. Typical height sections of  $V_6K$  in the presence of (d) sodium carbonate, (e) sodium sulfate, and (f) sodium phosphate.

**Table 1.** Shifts in the negative CD peak from A<sub>6</sub>K/V<sub>6</sub>K solutions with different counterions with reference to the A<sub>6</sub>K/V<sub>6</sub>K peak without any added counterions

|                 | A <sub>6</sub> K/carbonate | A <sub>6</sub> K/sulfate | A <sub>6</sub> K/phosphate | V <sub>6</sub> K/carbonate | V <sub>6</sub> K/sulfate | V <sub>6</sub> K/phosphate |
|-----------------|----------------------------|--------------------------|----------------------------|----------------------------|--------------------------|----------------------------|
| peak shift (nm) | -7                         | -8                       | -10                        | 1                          | 1                        | 2                          |

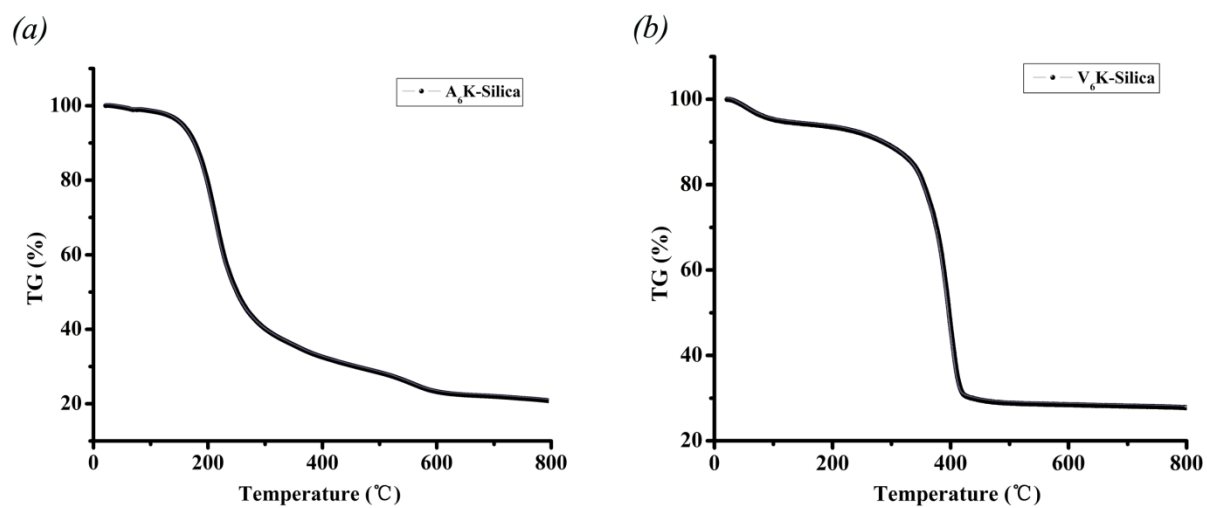

**Fig. S5** Thermogravimetric analysis (TGA) spectrum of (a) A<sub>6</sub>K-silica and (b) V<sub>6</sub>K-silica composites, respectively.
